# Supplementary material
Source: PubMed Central journal article supplement (PMC4898317)
Supplement: supp_WNL.0000000000002747_6.7.16_Prehospital_systolic_blood.pdf [file supp_WNL.0000000000002747_6.7.16_Prehospital_systolic_blood.pdf]

## Prehospital systolic blood pressure is higher in acute stroke compared with stroke mimics

ضغط الدم الانقباضي ما قبل المشفى أعلى في السكتة الدماغية الشديدة مقارنةً مع السكتة الدماغية الزائفة

**أهداف الدراسة:** تهدف هذه الدراسة إلى تقييم تسجيلات ضغط الدم الطبيعية ما قبل الوصول إلى المشفى أثناء قيام الخدمات الطبية الطارئة بنقل المريض الذي يُشتبه بأصابته بالسكتة الدماغية، كما وتسعى إلى تحديد ما إذا كان ضغط الدم ما قبل الوصول إلى المشفى يختلف حسب حالات المرضى الذين يُحتمل بإصابتهم بأحدى حالات السكتة الدماغية، بما فيها السكتة الدماغية الإقفارية والنوبة الدماغية العابرة ونزيف الدم في داخل المخ والسكتة الدماغية الزائفة.

**طرق البحث:** اعتمدت الدراسة على تحليل البيانات المركزية للخدمات الطبية الطارئة بأسلوب الاستعادة والاستعراض المقطعي والمراقبة خلال فترة زمنية أمدها 18 شهراً. وشملت بيانات الدراسة السجلات الإلكترونية للمرضى المنقولين إلى وحدات الطوارئ من قبل الخدمات الطبية الطارئة على أترالاشتباه بأصابتهم بالسكتة الدماغية. وتم استخدام مخططات المشفى الطبية وصور الأعصاب في تحديد التشخيص النهائي للسكتة الدماغية (السكتة الدماغية الإقفارية أو النوبة الدماغية العابرة أو نزيف الدم في داخل المخ أو السكتة الدماغية الزائفة).

**النتائج:** بلغ عدد المرضى الذين نقلوا إلى وحدة الطوارئ من قبل الخدمات الطبية الطارئة على أترالاشتباه بإصابتهم بالسكتة الدماغية 960 مريضاً. وشخصت السكتة الدماغية في 544 مريض (56.7%)، إذ شكلت السكتة الدماغية الإقفارية 38.2% والنوبة الإقفارية العابرة 12.2% ونزيف الدم في داخل المخ 5.3%، فيما سُخص 416 (43.2%) مريض بسكتة دماغية زائفة. وكان ضغط الدم الانقباضي حسب متوسط العمر المعدل ما قبل المشفى أعلى لدى مريض السكتة الدماغية الشديدة (155.6 مليلتر زئبقي وبفاصل ثقة تقديره 95%): و153.4-157.9 مليلتر زئبقي بالمقارنة مع السكتة الدماغية الزائفة (146.1 مليلتر زئبقي وبفاصل ثقة تقديره 95%: 142.5 - 148.6 مليلتر زئبقي،  $p > 0.001$ ).

وكان ضغط الدم الانقباضي حسب متوسط العمر المعدل أعلى في حال نزيف الدم في داخل المخ (172.3 مليلتر زئبقي وبفاصل ثقة تقديره 95%: 165.1 - 179.7 مليلتر زئبقي) عن السكتة الدماغية الإقفارية أو النوبة الدماغية العابرة (154.7 مليلتر زئبقي وبفاصل ثقة تقديره 95%: 152.3 - 157.0 مليلتر زئبقي،  $p > 0.001$ ، وكان هبوط متوسط ضغط الدم الانقباضي (مجال الشرائح الربعية) من ضغط الدم الانقباضي الأولي في فترة ما قبل المشفى إلى ضغط الدم الانقباضي في وحدة الطوارئ 4 مليلتر زئبقي (-6 إلى 17 مليلتر زئبقي)، وقد ارتبط إلى حد كبير متوسط ضغط الدم الانقباضي ما قبل المشفى مع ضغط الدم الانقباضي في وحدة الطوارئ ( $r = 0.82, p > 0.001$ ).

**الاستنتاجات:** يكون ضغط الدم الانقباضي أعلى في حالات السكتة الدماغية الشديدة مقارنة مع السكتة الدماغية الزائفة، إلا أنه يكون في اعلى مستوياته في حال نزيف الدم في داخل المخ. واستناداً إلى استقرار مستويات ضغط الدم عند مقارنة تسجيلاته في فترة نقل المريض من قبل الخدمات الطبية الطارئة مع تلك التي تقاس في وحدة الطوارئ قد يكون من الممكن اختبار فائدة وسلامة العلاج المضاد لفرط ارتفاع ضغط الدم في فترة ما قبل المشفى لدى المريض الذي يشتبه بأصابته بالسكتة الدماغية الشديدة.

---

**Objective:** To assess the natural history of prehospital blood pressure (BP) during emergency medical services (EMS) transport of suspected stroke and determine whether prehospital BP differs among types of patients with suspected stroke (ischemic stroke, TIA, intracerebral hemorrhage [ICH], or stroke mimic).

**Methods:** A retrospective, cross-sectional, observational analysis of a centralized EMS database containing electronic records of patients transported by EMS to the emergency department (ED) with suspected stroke during an 18-month period was conducted. Hospital charts and neuroimaging were utilized to determine the final diagnosis (ischemic stroke, TIA, ICH, or stroke mimic).

**Results:** A total of 960 patients were transported by EMS to ED with suspected stroke. Stroke was diagnosed in 544 patients (56.7%) (38.2% ischemic stroke, 12.2% TIA, 5.3% ICH) and 416 (43.2%) were considered mimics. Age-adjusted mean prehospital systolic BP (SBP) was higher in acute stroke patients (155.6 mm Hg; 95% confidence interval [CI]: 153.4–157.9 mm Hg) compared to mimics (146.1 mm Hg; 95% CI: 142.5–148.6 mm Hg;  $p < 0.001$ ). Age-adjusted mean prehospital SBP was higher in ICH (172.3 mm Hg; 95% CI: 165.1–179.7 mm Hg) than in either ischemic stroke or TIA (154.7 mm Hg; 95% CI: 152.3–157.0 mm Hg;  $p < 0.001$ ). Median (interquartile range) SBP drop from initial prehospital SBP to ED SBP was 4 mm Hg (–6 to 17 mm Hg). Mean prehospital SBP was strongly correlated with ED SBP ( $r = 0.82$ ,  $p < 0.001$ ).

**Conclusions:** Prehospital SBP is higher in acute stroke relative to stroke mimics and highest in ICH. Given the stability of BP between initial EMS and ED measurements, it may be reasonable to test the feasibility and safety of prehospital antihypertensive therapy in patients with suspected acute stroke.

---

**Translator:** Zeena Faulk MA CHI, Kent State University, Kent, OH

**Translation Reviewer:** Mohamed Kazamel MD, Department of Neurology, University of Alabama at Birmingham, AL
